# Supplementary material
Source: publisher figshare collection journal article supplement (https://karger.figshare.com/ndownloader/files/26704616)
Supplement: Supplementary file 1 [file 26704616]

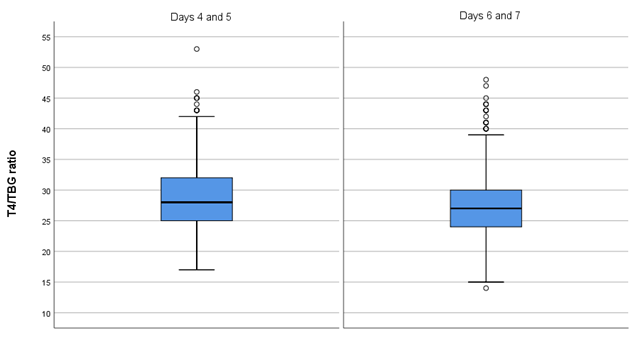
Fig. S4. T4/TBG ratios of reference subjects divided by subgroup: NBS sampling days 4 and 5, and days 6 and 7.
Data are presented in boxplots.
